# Supplementary material for: Nitroprusside Combined with Leg Raise at the Time of Right Heart Catheterization to Differentiate Precapillary from Other Hemodynamic Forms of Pulmonary Hypertension: A Single-Center Pilot Study
Source: MDPI journal article supplement (doi:10.3390/jcdd11040124), 2024-04-19
Supplement: s1 [file s1]

Supplemental Tables:

**Supplementary Table S1: RHC Hemodynamic Parameters in Response to Nitroprusside**

| Parameter                        | PH <sub>PVD</sub> | PH <sub>LHD</sub> | P-value <sup>a</sup> |
|----------------------------------|-------------------|-------------------|----------------------|
|                                  | Mean ± STDev      | Mean ± STDev      |                      |
| RAP (mmHg)                       | 6.92 ± 2.81       | 11.80 ± 4.57      | 0.0132               |
| PASP (mmHg)                      | 47.85 ± 15.82     | 63.00 ± 10.83     | 0.0045               |
| PADP (mmHg)                      | 19.14 ± 4.99      | 26.60 ± 6.28      | 0.0024               |
| mPAP (mmHg)                      | 28.71 ± 7.62      | 38.73 ± 7.43      | 0.0012               |
| PCWP (mmHg)                      | 11.64 ± 3.34      | 20.50 ± 4.01      | 0.0001               |
| DPG (mmHg)                       | 7.50 ± 4.27       | 6.10 ± 5.57       | 0.3435               |
| TPG (mmHg)                       | 17.07 ± 7.08      | 18.23 ± 6.85      | 0.7632               |
| PVR (WU)                         | 4.24 ± 1.92       | 4.13 ± 1.91       | 0.8793               |
| SVR (mmHg·min·mL <sup>-1</sup> ) | 1449.80 ± 362.16  | 1169.86 ± 413.40  | 0.2030               |
| CO (L/min)                       | 4.28 ± 1.47       | 4.79 ± 1.41       | 0.3349               |
| CI (L/min/m <sup>2</sup> )       | 2.25 ± 0.75       | 2.39 ± 0.56       | 0.3669               |
| SV (ml)                          | 58.40 ± 17.10     | 66.43 ± 21.15     | 0.2839               |
| SVi (ml/m <sup>2</sup> )         | 30.85 ± 9.37      | 33.74 ± 11.32     | 0.6049               |
| HR (bpm)                         | 72.79 ± 8.78      | 73.50 ± 15.11     | 0.6139               |
| MAP (mmHg)                       | 76.29 ± 10.10     | 76.00 ± 11.26     | 0.8517               |
| PAPi                             | 4.58 ± 1.95       | 3.82 ± 2.34       | 0.3328               |
| RAP: PCWP                        | 0.58 ± 0.17       | 0.58 ± 0.20       | 0.9428               |
| LVTMFP                           | 5.15 ± 2.44       | 8.70 ± 3.89       | 0.0387               |

Notes: For nominal variables n (%), for continuous variables mean (range) standard deviation. Abbreviations: RAP, right atrial pressure; PASP, pulmonary artery systolic pressure; PADP, pulmonary artery diastolic pressure; mPAP, mean pulmonary artery pressure; PCWP, pulmonary capillary wedge pressure; DPG, diastolic pulmonary gradient; TPG, transpulmonary gradient; PVR, pulmonary vascular resistance; WU, wood units; SVR, systemic vascular resistance; CO, cardiac output; CI, cardiac index; SV, stroke volume; HR, heart rate; MAP, mean arterial pressure; PAPi, pulmonary artery Pulsatility index; LVTMFP, left ventricular transmural filling pressure

<sup>a</sup> p-value is comparison of post nitroprusside PH<sub>LHD</sub> vs. post nitroprusside PH<sub>PVD</sub> hemodynamic parameters

**Supplementary Table S2: RHC Hemodynamic Parameters in Response to Nitroprusside Administration and Leg Raise Maneuver: PH<sub>PVD</sub> with Leg Raise PCWP ≤ 18mmHg vs. PH<sub>PVD</sub> with Leg Raise PCWP > 18mmHg vs. PH<sub>LHD</sub>**

|                    | PH <sub>PVD</sub> Group with PCWP ≤ 18mmHg Post Leg Raise Maneuver |               |                | PH <sub>PVD</sub> Group with PCWP > 18mmHg Post Leg Raise Maneuver |              |                | PH <sub>LHD</sub> Group with PCWP > 18 mmHg Post Leg Raise Maneuver |              |                |
|--------------------|--------------------------------------------------------------------|---------------|----------------|--------------------------------------------------------------------|--------------|----------------|---------------------------------------------------------------------|--------------|----------------|
|                    | N=6                                                                |               |                | N=3                                                                |              |                | N=2                                                                 |              |                |
|                    | Rest                                                               | Post Nipride  | Post Leg Raise | Rest                                                               | Post Nipride | Post Leg Raise | Rest                                                                | Post Nipride | Post Leg Raise |
|                    | Mean ± STDev                                                       | Mean ± STDev  | Mean ± STDev   | Mean ± STDev                                                       | Mean ± STDev | Mean ± STDev   | Mean ± STDev                                                        | Mean ± STDev | Mean ± STDev   |
| <b>RAP (mmHg)</b>  | 8.67 ± 3.14                                                        | 6.33 ± 2.42   | 10.5 ± 4.32    | 9.33 ± 3.06                                                        | 6 ± 1.73     | 12.33 ± 2.08   | 21 ± 1.41                                                           | 15 ± 1.41    | 23 ± 5.66      |
| <b>PASP (mmHg)</b> | 66.33 ± 17.91                                                      | 51.83 ± 11.43 | 61.67 ± 12.36  | 60.67 ± 13.32                                                      | 44.00 ± 6.56 | 61.00 ± 11.53  | 63 ± 7.07                                                           | 52 ± 5.66    | 60 ± 14.14     |
| <b>PADP (mmHg)</b> | 24.5 ± 6.69                                                        | 19.33 ± 4.41  | 24.17 ± 5.38   | 22.33 ± 3.79                                                       | 18.67 ± 3.21 | 25.67 ± 4.04   | 28 ± 2.83                                                           | 24 ± 0       | 30 ± 2.83      |
| <b>mPAP (mmHg)</b> | 38.44 ± 9.74                                                       | 30.17 ± 5.94  | 36.67 ± 6.55   | 35.11 ± 6.94                                                       | 27.11 ± 3.10 | 37.44 ± 6.26   | 39.67 ± 4.24                                                        | 33.33 ± 1.89 | 40 ± 7.07      |
| <b>PCWP (mmHg)</b> | 17 ± 3.85                                                          | 10.50 ± 3.15  | 14.67 ± 2.66†  | 18.33 ± 1.53                                                       | 13 ± 2.65    | 20.33 ± 0.58†  | 22.5 ± 3.54†                                                        | 19 ± 1.41    | 24.5 ± 0.71††  |
| <b>DPG (mmHg)</b>  | 7.5 ± 3.62                                                         | 8.83 ± 4.12   | 9.50 ± 3.08    | 4.00 ± 2.65                                                        | 5.67 ± 5.03  | 5.33 ± 3.79    | 5.5 ± 0.71                                                          | 5 ± 1.41     | 5.5 ± 2.12     |
| <b>TPG (mmHg)</b>  | 21.44 ± 6.72                                                       | 19.67 ± 4.88  | 22.00 ± 4.51   | 16.78 ± 5.62                                                       | 14.11 ± 5.68 | 17.11 ± 5.82   | 17.17 ± 0.71                                                        | 14.33 ± 0.47 | 15.5 ± 6.36    |

Abbreviations: RAP, right atrial pressure; PASP, pulmonary artery systolic pressure; PADP, pulmonary artery diastolic pressure; mPAP, mean pulmonary artery pressure; PCWP, pulmonary capillary wedge pressure; DPG, diastolic pulmonary gradient; TPG, transpulmonary gradient;

† Denotes P<0.05 between each group with same condition, ie post leg raise PCWP in each subgroup

† Denotes  $P < 0.05$  between resting  $\text{PH}_{\text{PVD}}$  PCWP  $\leq 18$  post leg raise vs  $\text{PH}_{\text{PVD}}$  PCWP  $> 18$  post LR group of same condition, ie PCWP at rest in each group

‡ Denotes  $P < 0.05$  between  $\text{PH}_{\text{PVD}}$  groups vs  $\text{PH}_{\text{LHD}}$  group with PCWP  $> 18$  group in same condition, ie PCWP at rest conditions

**Supplementary Table S3: Hemodynamic Changes in RHC Parameters in Response to Nitroprusside Administration and Leg Raise Maneuver: PH<sub>PVD</sub> with Leg Raise PCWP ≤ 18mmHg vs. PH<sub>PVD</sub> with Leg Raise PCWP > 18mmHg vs. PH<sub>LHD</sub>**

| Δ Post Nitroprusside - Rest       |                                                                     |                                                                     |                                                                     |
|-----------------------------------|---------------------------------------------------------------------|---------------------------------------------------------------------|---------------------------------------------------------------------|
|                                   | PH <sub>PVD</sub> with PCWP ≤ 18mmHg Post Leg Raise<br>Mean ± STDev | PH <sub>PVD</sub> with PCWP > 18mmHg Post Leg Raise<br>Mean ± STDev | PH <sub>LHD</sub> with PCWP > 18mmHg Post Leg Raise<br>Mean ± STDev |
| ΔRAP (mmHg)                       | -2.33 ± 0.82                                                        | -3.33 ± 2.08                                                        | -6.00 ± 0                                                           |
| ΔPASP (mmHg)                      | -14.5 ± 11.69                                                       | -16.67 ± 17.90                                                      | -11.00 ± 1.41                                                       |
| ΔPADP (mmHg)                      | -5.17 ± 2.99                                                        | -3.67 ± 6.51                                                        | -4.00 ± 2.83                                                        |
| ΔmPAP (mmHg)                      | -8.28 ± 5.52                                                        | -8.00 ± 10.02                                                       | -6.33 ± 2.36                                                        |
| ΔPCWP (mmHg)                      | -6.50 ± 4.23                                                        | -5.33 ± 2.08                                                        | -3.5 ± 2.12                                                         |
| ΔDPG (mmHg)                       | 1.33 ± 4.13                                                         | 1.67 ± 7.37                                                         | -0.50 ± 0.71                                                        |
| ΔTPG (mmHg)                       | -1.78 ± 4.64                                                        | -2.67 ± 11.27                                                       | -2.83 ± 0.24                                                        |
| ΔPVR (WU)                         | -1.02 ± 2.03                                                        | -0.69 ± 2.21                                                        |                                                                     |
| ΔSVR (mmHg·min·mL <sup>-1</sup> ) | -557.47 ± 352.52                                                    | -543.34 ± 185.59                                                    |                                                                     |
| Δ CO (L/min)                      | 0.16 ± 0.48                                                         | -0.30 ± 0.60                                                        |                                                                     |
| Δ CI (L/min/m <sup>2</sup> )      | 0.10 ± 0.28                                                         | 0.00 ± 0.10                                                         |                                                                     |
| ΔSV (ml)                          | -2.80 ± 6.43                                                        | -7.45 ± 13.41                                                       |                                                                     |
| ΔSVi (ml/m <sup>2</sup> )         | -1.58 ± 3.77                                                        | -1.25 ± 3.50                                                        |                                                                     |
| ΔHR (bpm)                         | 5.50 ± 5.65                                                         | 2.67 ± 5.86                                                         |                                                                     |
| ΔMAP (mmHg)                       | -23.83 ± 9.13                                                       | -37.33 ± 14.01                                                      |                                                                     |
| ΔPAPi                             | 0.08 ± 1.29                                                         | 0.41 ± 1.40                                                         |                                                                     |
| ΔRAP: PCWP                        | 0.09 ± 0.23                                                         | -0.04 ± 0.16                                                        |                                                                     |
| ΔLVTMFP                           | -4.17 ± 4.71                                                        | -2.00 ± 3.61                                                        |                                                                     |

  

| Δ Leg Raise - Resting |                                                                     |                                                                     |                                                                     |
|-----------------------|---------------------------------------------------------------------|---------------------------------------------------------------------|---------------------------------------------------------------------|
|                       | PH <sub>PVD</sub> with PCWP ≤ 18mmHg Post Leg Raise<br>Mean ± STDev | PH <sub>PVD</sub> with PCWP > 18mmHg Post Leg Raise<br>Mean ± STDev | PH <sub>LHD</sub> with PCWP > 18mmHg Post Leg Raise<br>Mean ± STDev |
| Δ RAP (mmHg)          | 1.83 ± 3.87                                                         | 3.00 ± 1.73                                                         | 2.00 ± 4.25                                                         |
| Δ PASP (mmHg)         | -4.67 ± 11.57                                                       | 0.33 ± 4.04                                                         | -3.00 ± 7.01                                                        |
| Δ PADP (mmHg)         | -0.33 ± 5.85                                                        | 3.33 ± 0.58                                                         | 2.00 ± 0.00                                                         |
| Δ mPAP (mmHg)         | -1.78 ± 7.71                                                        | 2.33 ± 1.00                                                         | 0.33 ± 2.83                                                         |
| Δ PCWP (mmHg)         | -2.33 ± 3.20                                                        | 2.00 ± 1.00                                                         | 2.00 ± 2.83                                                         |
| Δ DPG (mmHg)          | 2.00 ± 3.22                                                         | 1.33 ± 1.15                                                         | 0.00 ± 2.83                                                         |
| Δ TPG (mmHg)          | 0.56 ± 4.98                                                         | 0.33 ± 1.00                                                         | -1.67 ± 5.67                                                        |
| ΔPVR (WU)             | NR                                                                  | NR                                                                  | NR                                                                  |

  

| Δ Leg Raise - Nitroprusside |  |  |  |
|-----------------------------|--|--|--|
|-----------------------------|--|--|--|

|               | <b>PH<sub>FVD</sub> with PCWP ≤ 18mmHg Post Leg Raise</b><br>Mean ± STDev | <b>PH<sub>FVD</sub> with PCWP &gt; 18mmHg Post Leg Raise</b><br>Mean ± STDev | <b>PH<sub>LHD</sub> with PCWP &gt; 18mmHg Post Leg Raise</b><br>Mean ± STDev |
|---------------|---------------------------------------------------------------------------|------------------------------------------------------------------------------|------------------------------------------------------------------------------|
| Δ RAP (mmHg)  | 4.17 ± 3.54                                                               | 6.33 ± 2.31                                                                  | 8.00 ± 4.24                                                                  |
| Δ PASP (mmHg) | 9.83 ± 10.70                                                              | 17.00 ± 14.93                                                                | 8.00 ± 8.49                                                                  |
| Δ PADP (mmHg) | 4.83 ± 3.49                                                               | 7.00 ± 6.56                                                                  | 6.00 ± 2.83                                                                  |
| Δ mPAP (mmHg) | 6.50 ± 5.35                                                               | 10.33 ± 9.29                                                                 | 6.66 ± 5.19                                                                  |
| Δ PCWP (mmHg) | 4.17 ± 4.62                                                               | 7.33 ± 2.52                                                                  | 5.50 ± 0.71                                                                  |
| Δ DPG (mmHg)  | 0.67 ± 2.25                                                               | -0.33 ± 8.5                                                                  | 0.5 ± 3.54                                                                   |
| Δ TPG (mmHg)  | 2.33 ± 1.33                                                               | 3.00 ± 11.36                                                                 | 1.17 ± 5.89                                                                  |
| ΔPVR (WU)     | NR                                                                        | NR                                                                           | NR                                                                           |

Δ: delta; RAP, right atrial pressure; PASP, pulmonary arterial systolic pressure; PADP, pulmonary artery diastolic pressure; mPAP, mean pulmonary arterial pressure; PCWP, pulmonary capillary wedge pressure; DPG, diastolic pulmonary gradient; TPG, trans pulmonary gradient; PVR, pulmonary vascular resistance; SVR, systemic vascular resistance; CO, cardiac output; CI, cardiac index; SV, stroke volume; SVi, stroke volume index; HR, heart rate; MAP, mean arterial pressure; PAPI, pulmonary arterial pulsatility index; LVTMFP, left ventricular transmural filling pressure.

**Supplementary Table S4: Comparison of Echocardiographic and Functional Parameters in the Leg Raise Cohort: PH<sub>PVD</sub> with Leg Raise PCWP ≤ 18mmHg vs. PH<sub>PVD</sub> with Leg Raise PCWP > 18mmHg vs. PH<sub>LHD</sub>**

| Parameters                   | PH <sub>PVD</sub> with Leg Raise<br>PCWP ≤ 18mmHg<br><br>Mean ± STDev | PH <sub>PVD</sub> with Leg Raise<br>PCWP > 18mmHg<br><br>Mean ± STDev | PH <sub>LHD</sub><br><br>Mean ± STDev |
|------------------------------|-----------------------------------------------------------------------|-----------------------------------------------------------------------|---------------------------------------|
| Echocardiographic            |                                                                       |                                                                       |                                       |
| LVEF                         | 64.5 ± 9.12                                                           | 63.33 ± 7.02                                                          | 65 ± 1.41                             |
| LVOT VTI                     | 21.55 ± 6.31                                                          | 21.27 ± 5.54                                                          | 15.1 ± 5.37                           |
| LAVi                         | 34.72 ± 10.04                                                         | 38.17 ± 16.85                                                         | 70.9 ± 72.27                          |
| E/A                          | 1.65 ± 0.91                                                           | NR                                                                    | NR                                    |
| E' (m/s)                     | 7.30 ± 2.47                                                           | 6.5 ± 0.56                                                            | 8.9 ± 0.85                            |
| E/e'                         | 15.97 ± 7.18                                                          | 12.7 ± 2.72                                                           | 10.9 ± 1.41                           |
| Diastolic<br>dysfunction     | 3 (50%)                                                               | 1 (33.33%)                                                            | 1 (50%)                               |
| Septal flattening            | 5 (83.33%)                                                            | 2 (66.67%)                                                            | 1 (50%)                               |
| RVEDd (cm) - basal<br>length | 4.22 ± 0.66                                                           | 3.94 ± 0.29                                                           | 5.55 ± 0.78                           |
| RVOT notch                   | 4 (66.67%)                                                            | 2 (66.67%)                                                            | 2 (66.67%)                            |
| RVOT VTI (cm)                | 16.13 ± 4.55                                                          | 15.68 ± 1.19                                                          | 11.25 ± 5.73                          |
| RA size (RAVi)               | 35.73 ± 12.43                                                         | 24.9 ± 10.09                                                          | 57.3 ± 15.7                           |
| PASP                         | 59.8 ± 17.51                                                          | 47.33 ± 21.73                                                         | 51 ± 21.21                            |
| TAPSE                        | 2.03 ± 0.61                                                           | 2.43 ± 0.71                                                           | 1.25 ± 0.35                           |
| RV S'                        | 13.85 ± 3.59                                                          | 11.23 ± 1.58                                                          | 6.8 ± 0.57                            |
| Pulmonary Function Tests     |                                                                       |                                                                       |                                       |
| FEV1 (%)                     | 68.67 ± 24.59                                                         | 90 ± 25.46                                                            | 91 ± 31.11                            |
| FVC (%)                      | 73.67 ± 17.84                                                         | 93 ± 7.07                                                             | 84.5 ± 26.16                          |
| FEV1/FVC (%)                 | 68.5 ± 16.53                                                          | 68 ± 14.14                                                            | 76.5 ± 3.54                           |
| TLC (%)                      | 79.2 ± 11.12                                                          | NR                                                                    | 88.5 ± 27.58                          |
| RV (%)                       | 81.2 ± 36.79                                                          | NR                                                                    | 94 ± 41.01                            |
| RV/TLC (%)                   | 1.01 ± 0.37                                                           | NR                                                                    | 1.04 ± 0.14                           |
| DLCO adjusted                | 47.6 ± 23.67                                                          | 69.5 ± 10.61                                                          | 75.5 ± 10.61                          |

Abbreviations: LVEF, left ventricular ejection fraction; LVOT, left ventricular outflow tract; LAVi: left atrial volume index; E, early diastolic transmitral flow velocity; A, late diastolic transmitral flow velocity; E' early diastolic tissue velocity, e', early diastolic mitral annular velocity; IVS, interventricular septum; RVEDd, right ventricular end-diastolic diameter;

RVOT, right ventricular outflow tract; VTI, velocity time integral; RA, right atrium; RAVi, right atrial volume index; PASP, pulmonary arterial systolic pressure; TAPSE, tricuspid annular plane systolic excursion; RV, right ventricle;  $S'$ , peak tricuspid annular systolic tissue velocity; FEV1, forced expiratory volume in the first second; FVC, forced vital capacity; TLC, total lung capacity;  $RV^*$ , residual volume; DLCO, diffusing capacity of the lungs for carbon monoxide.

Supplementary Table S5: PH<sub>PVD</sub> response to PAH therapy within three months of initiation (Raw Data)

| Patient | Etiology of PVD | PH Therapy added                                              | Pre-PH therapy 6MWT (m) | Post-PH therapy 6MWT (m) | Pre-PH therapy NT-BNP (pg/mL) | Post-PH therapy NT-BNP (pg/mL) | Pre-PH therapy FC | Post-PH therapy FC | Pre-PH therapy REVEAL Lite 2.0 risk score | Post-PH therapy REVEAL Lite 2.0 risk score |
|---------|-----------------|---------------------------------------------------------------|-------------------------|--------------------------|-------------------------------|--------------------------------|-------------------|--------------------|-------------------------------------------|--------------------------------------------|
| 1       | ILD             | Sildenafil 40 mg PO q8hrs +INH<br>Treprostinil 64 mcg INH QID | 121                     | 330                      | 15192                         | 4236                           | III               | II                 | 12                                        | 7                                          |
| 2       | ILD             | Sildenafil 60 mg PO q8hrs <sup>a</sup>                        | 40                      | 185                      | 3298                          | 1046                           | III               | II                 | 11                                        | 6                                          |
| 3       | Toxin           | Sildenafil 20 mg PO q8hrs <sup>a</sup>                        | 50                      | 180                      | 35000                         | 19109                          | IV                | III                | 12                                        | 8                                          |
| 4       | Idiopathic .    | Sildenafil 60 mg q8hr                                         | 61                      | 305                      | 235                           | 151                            | III               | II                 | 9                                         | 4                                          |
| 5       | Idiopathic .    | Sildenafil 20 mg PO q8hrs                                     | 303                     | 388                      | 5019                          | 799                            | III               | II                 | 10                                        | 5                                          |

Abbreviations: PVD: Pulmonary vascular disease; PH: Pulmonary hypertension; ILD, interstitial lung disease; INH: Inhaled; PO: Per os (by mouth); q8hr: every eight hours; mcg: micrograms; 6MWD, six minute walk distance; WHO FC, World Health Organization Functional Class; m: meters; NT-proBNP, N-terminal-pro Brain Natriuretic Peptide; REVEAL Lite 2.0 Risk Score, Registry to Evaluate Early and Long Term PAH Disease Management Lite 2.0 risk score [23].

<sup>a</sup>Patient refused additional therapy
